# Supplementary material for: Patient Awareness of Reported Adverse Effects Associated with Proton Pump Inhibitors in a Medically Underserved Community
Source: MDPI journal article supplement (doi:10.3390/healthcare8040499), 2020-11-19
Supplement: s1 [file s1]

**Survey: For patients who are taking PPIs or have taken them in the past year. Please check/circle your choices.**

|                                                                                                           |                                                  |                                   |                                                    |                                                             |                                    |                                                            |                       |       |
|-----------------------------------------------------------------------------------------------------------|--------------------------------------------------|-----------------------------------|----------------------------------------------------|-------------------------------------------------------------|------------------------------------|------------------------------------------------------------|-----------------------|-------|
| <b>Age group (years)</b>                                                                                  | 18-30                                            | 31-40                             | 41-50                                              | 51-60                                                       | 61-70                              | 71-80                                                      | Above 80              |       |
| <b>Gender</b>                                                                                             | Male                                             | Female                            | Other                                              |                                                             |                                    |                                                            |                       |       |
| <b>Educational level</b>                                                                                  | Less than high school                            | High school                       | Undergraduate                                      | Graduate                                                    | Post-Graduate                      |                                                            |                       |       |
| <b>Ethnicity/Race</b>                                                                                     | African-American                                 | Asian-American                    | Caucasian                                          | Non-White Hispanic                                          | Other                              |                                                            |                       |       |
| <b>Doctor who prescribed PPI</b>                                                                          | Primary Doctor                                   | Gastroenterology (Stomach) Doctor | Ear, Nose, and Throat Doctor                       | Pulmonologist (Lung Doctor)                                 | Other                              |                                                            |                       |       |
| <b>Which PPI do/did you take?</b>                                                                         | Do not know name                                 | Omeprazole (Prilosec)             | Pantoprazole (Protonix)                            | Esomeprazole (Nexium)                                       | Lansoprazole (Prevacid)            | Dexlansoprazole (Dexilant)                                 | Rabeprazole (AcipHex) | Other |
| <b>Do you know your dose of PPI?</b>                                                                      | Yes. Dose:                                       | No                                |                                                    |                                                             |                                    |                                                            |                       |       |
| <b>How long you were or are on PPI?</b>                                                                   | Less than one year                               | 1-3 years                         | More than 3 to up to 5 years                       | More than 5 up to 7 years                                   | More than 7 to up to 10 years      | More than 10 years                                         |                       |       |
| <b>How often did your doctor recommend to take PPI?</b>                                                   | Daily                                            | Only when I have symptoms         |                                                    |                                                             |                                    |                                                            |                       |       |
| <b>How often do/did you take PPI?</b>                                                                     | Less than one time per week                      | One or two times per week         | 3-6 times per week                                 | One time everyday                                           | Two times everyday                 | More than two times everyday                               |                       |       |
| <b>Reason to take PPI (choose all that apply)</b>                                                         | Heartburn/Gastro-esophageal reflux disease(GERD) | Stomach or Intestinal Ulcer       | Barrett's Esophagus (abnormal lining of esophagus) | I also take drugs like Ibuprofen, Motrin, Advil, Aleve etc) | Other                              | I don't know                                               |                       |       |
| <b>If you recently stopped your PPI, please indicate your reason for stopping (choose all that apply)</b> | My doctor stopped prescribing the medication.    | It was not working.               | I did not know why I was taking the medication.    | I was worried that there may be side effects.               | I could not afford the medication. | I switched to a different acid medicine. Name of medicine: | Other. List:          |       |
| <b>Are you aware of side effects of PPIs?</b>                                                             | Yes                                              | No                                |                                                    |                                                             |                                    |                                                            |                       |       |

If you answered no, then this survey is now over. Please read the debriefing document that discusses the known and unknown side effects of PPIs in more detail. If you answered yes to the previous question, then please continue the survey.

|                                                                                |               |                                        |                        |                |                |                     |                              |                             |
|--------------------------------------------------------------------------------|---------------|----------------------------------------|------------------------|----------------|----------------|---------------------|------------------------------|-----------------------------|
| Choose <u>all specific side effects</u> of PPIs of which you are aware         | Pneumonia     | <i>Clostridium difficile</i> infection | Renal (kidney) disease | Dementia       | Other. List:   |                     |                              |                             |
| How did you hear about PPI side effects?                                       | News. Source: | Internet. Website:                     | Medication booklet     | Friends/Family | Primary doctor | GI (stomach) doctor | Ear, Nose, and Throat Doctor | Pulmonologist (Lung Doctor) |
| Because of side effects, have you changed the dose, frequency, or stopped PPI? | Yes           | No                                     |                        |                |                |                     |                              |                             |

If you answered no, then this survey is now over. If you answered yes to the previous question, then please continue the survey.

|                                                                      |                          |    |  |  |  |  |  |  |
|----------------------------------------------------------------------|--------------------------|----|--|--|--|--|--|--|
| Have you stopped the medicine completely?                            | Yes                      | No |  |  |  |  |  |  |
| Do you take it less often?                                           | Yes                      | No |  |  |  |  |  |  |
| Did you switch to lower dose?                                        | Yes                      | No |  |  |  |  |  |  |
| If you stopped completely, did you switch to a different medication? | Yes. Name of medication: | No |  |  |  |  |  |  |
| Did you discuss any of these changes with your doctor?               | Yes                      | No |  |  |  |  |  |  |

Thank you for taking the survey.
